# Supplementary material
Source: ML conference proceedings conference paper supplement (https://proceedings.mlr.press/v226/beckmann24a.html)
Supplement: Supplementary file 1 [file beckmann24a-supp.pdf]

Appendix A. Appendix

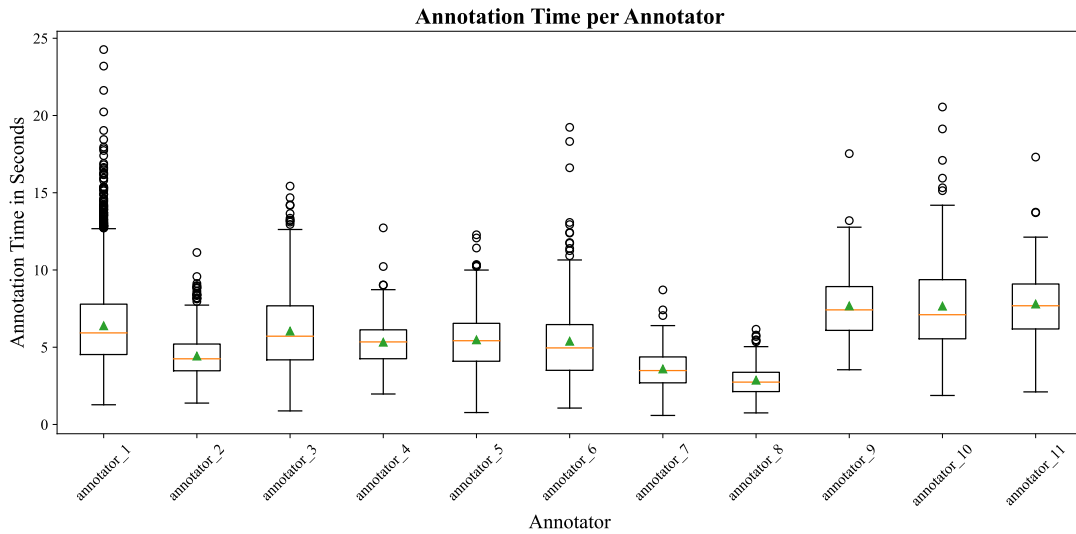

Figure A.1: Boxplot of the annotation time per human annotator for all datasets aggregated. The green triangles visualize the mean values.

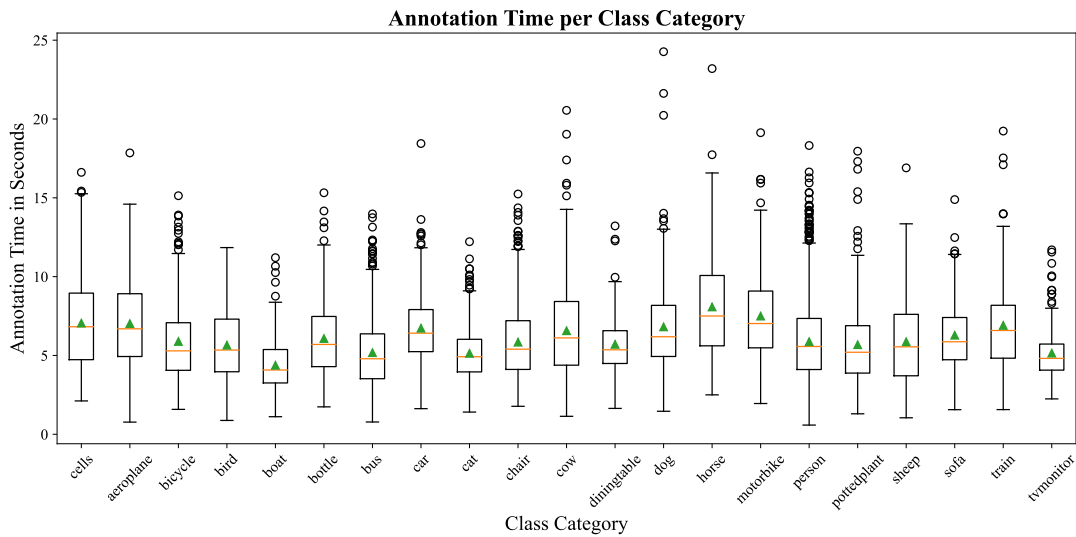

Figure A.2: Boxplot of the annotation time per class category for all datasets aggregated. The green triangles visualize the mean values.

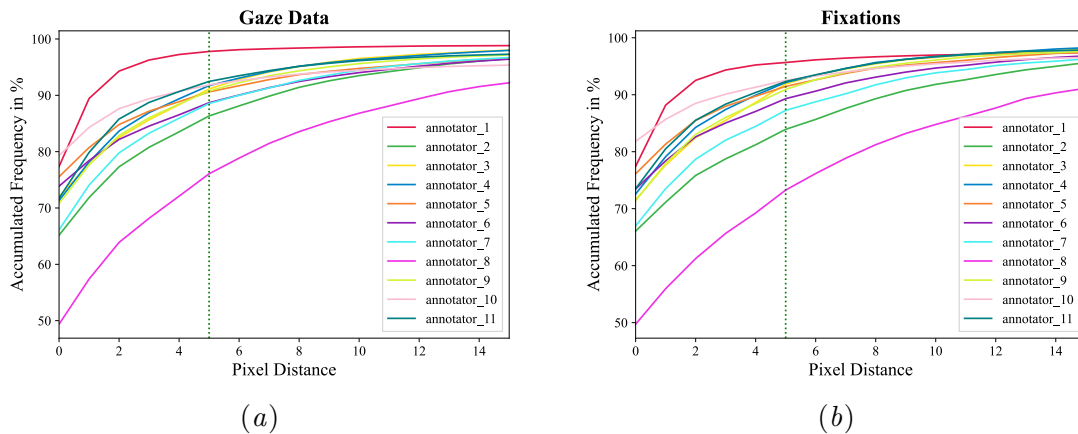

Figure A.3: (a) Raw Gaze Data and (b) Fixations grouped by their distance to the ground truth mask of all datasets grouped per human annotator.

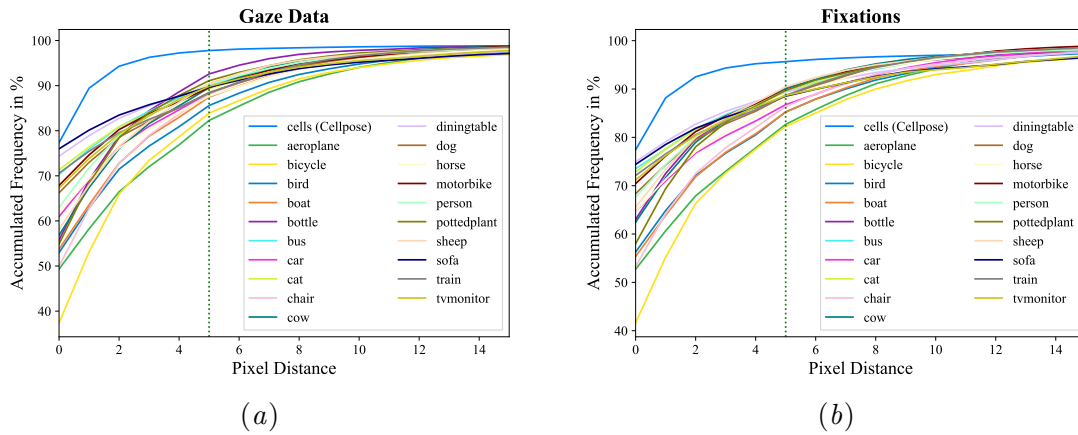

Figure A.4: (a) Raw Gaze Data and (b) Fixations grouped by their distance to the ground truth mask of all datasets grouped per class category.

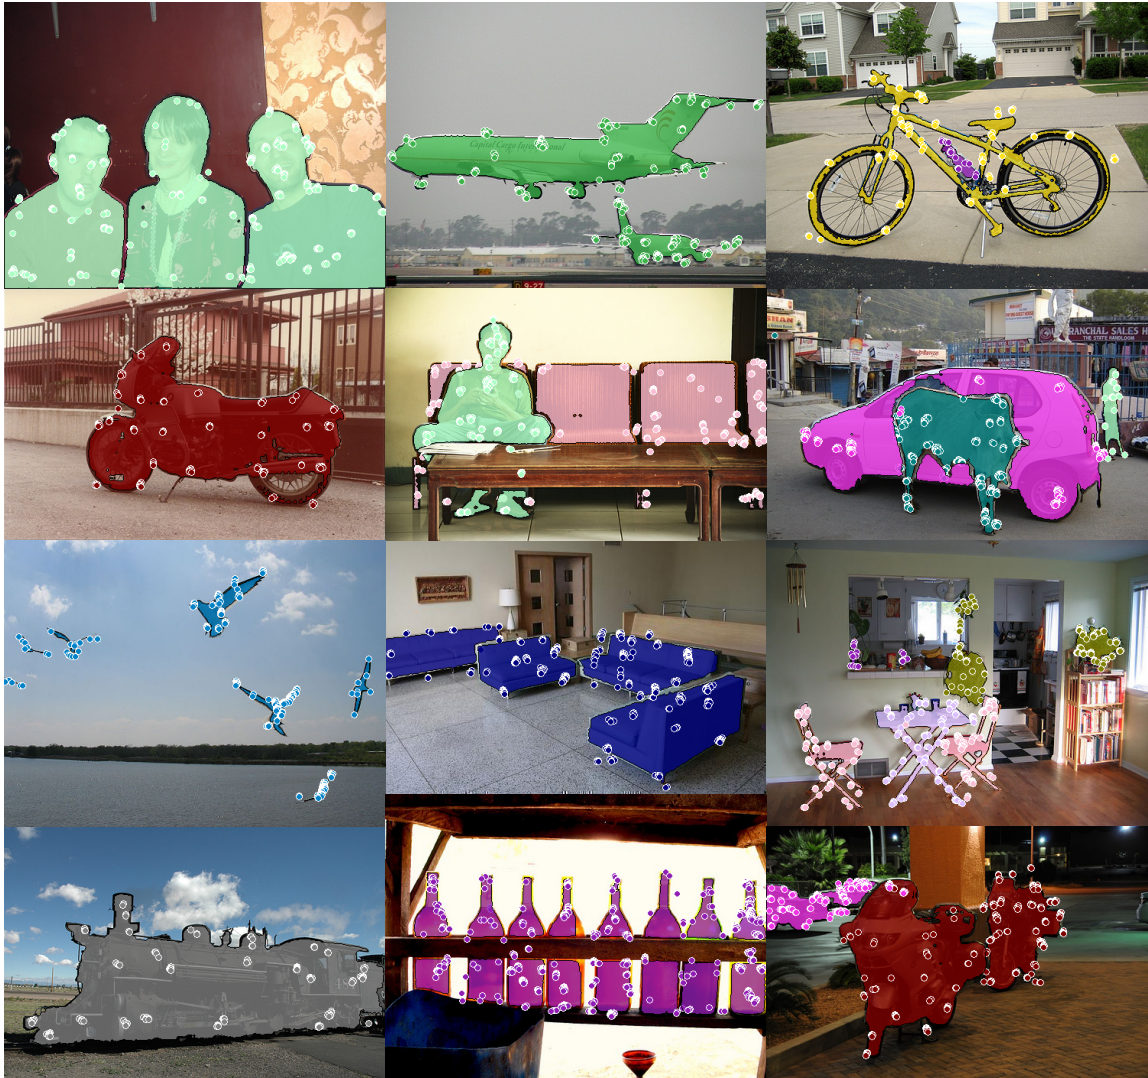

Figure A.5: Additional example results for fixation-based prompt segmentation.
